# Supplementary material
Source: publisher figshare collection journal article supplement (https://sage.figshare.com/ndownloader/files/23349734)
Supplement: Supplementary file 1 [file 23349734]

## **Appendix 1.** Pharmacy and Physician Assistant Student Team Meeting - Team Dynamics Checklist

Use this checklist during the last 10-15 minutes of your day to critique your team's dynamics. Discuss any problem(s) raised by the items. Why did it occur? What can be done to prevent reoccurrence? How can you improve your team efficiency? How can you improve your team patient care?

### **Participation**

- ✓ Did each team member adequately participate in patient and preceptor discussions?
- ✓ Did each team member contribute ideas to the problem definition?
- ✓ Did each team member contribute solutions to the care plan?
- ✓ How did each team member respect the other team member and preceptor?
- ✓ How did each team member show s/he valued the other team member?
- ✓ How could participation be improved?

### **Communications**

- ✓ How well did each team member express her/himself (e.g. clearly, concisely)?
- ✓ Did the team members address relevant issues? Offer important ideas and solutions?
- ✓ Did team members follow up/ask for clarification on vague comments or positions by others?
- ✓ Did members listen attentively to team member and preceptor comments?
- ✓ How could team communications be improved?

### **Conflict**

- ✓ Did conflict or disagreement occur? Should there have been conflict or disagreement? If no, why didn't it

occur?

- ✓ When conflict or disagreement occurred,
  - ✓ Did a team member dominate or push her/his ideas on others?
  - ✓ Did a team member withdraw or fail to voice or pursue her/his position?
  - ✓ How did your team reach an agreement?
  - ✓ Did your team move too quickly in reaching an agreement?
- ✓ Which of the following styles of dealing with conflict or disagreement were used?
  - Withdrawal/Avoidance
  - Competition
  - Accommodation
  - Compromise
  - Cooperation
  - Coercion
  - Denial
- ✓ How could conflicts and disagreements be handled better?

## **Leadership**

- ✓ Did your team have a leader? How did that occur? ✓ Did the team provide patient care in a way that allowed each member to contribute her or his viewpoint/role?
- ✓ Was there leadership to create the necessary structure and organization for the team to complete its business?
- ✓ Was there adequate leadership for creating, challenging, and analyzing ideas?

## **Patient Care**

- ✓ How did working as a team improve patient care and outcomes?
- ✓ What strengths did each team member bring to the interprofessional team to improve patient outcomes?
- ✓ When should interprofessional teams be used for patient care? Why?
- ✓ How would you improve your team effectiveness to improve patient care outcomes and therapeutic decisions?
- ✓ How would you improve your team efficiency to deliver patient care and make therapeutic decisions?

✓ How should team care be documented?

**Patient Confidentiality**

✓ List 3 ways you maintained the dignity, privacy and confidentiality of team based patient interactions.

1. \_\_\_\_\_

2. \_\_\_\_\_

3. \_\_\_\_\_

**Other Concerns or Comments**

Modified Geriatric Interdisciplinary Team Training Material

## Appendix 2. Post IPE/IPCP program survey

Please answer the following questions related to your two days as a student providing care to patients in a community pharmacy and a clinic or emergency room.

1. I am \_\_\_\_\_ a pharmacy student \_\_\_\_\_ physician assistant student.
2. I can describe the contributions to patient care that my team member can offer.  
\_\_\_\_\_ Strongly agree    \_\_\_\_\_ Agree    \_\_\_\_\_ Neither agree or disagree    \_\_\_\_\_ Disagree  
\_\_\_\_\_ Strongly disagree
3. I was respected by my team member.  
\_\_\_\_\_ Strongly agree    \_\_\_\_\_ Agree    \_\_\_\_\_ Neither agree or disagree    \_\_\_\_\_ Disagree  
\_\_\_\_\_ Strongly disagree
4. Shared learning with my team member helped me to communicate better with patients.  
\_\_\_\_\_ Strongly agree    \_\_\_\_\_ Agree    \_\_\_\_\_ Neither agree or disagree    \_\_\_\_\_ Disagree  
\_\_\_\_\_ Strongly disagree
5. Shared learning with my team member will help me communicate better with other health care professionals.  
\_\_\_\_\_ Strongly agree    \_\_\_\_\_ Agree    \_\_\_\_\_ Neither agree or disagree    \_\_\_\_\_ Disagree  
\_\_\_\_\_ Strongly disagree

6. Shared learning with my team member increased my ability to understand the patient's clinical problems.

\_\_\_\_\_ Strongly agree    \_\_\_\_\_ Agree    \_\_\_\_\_ Neither agree or disagree    \_\_\_\_\_ Disagree  
\_\_\_\_\_ Strongly disagree

7. The team approach improves the quality of care to patients.

\_\_\_\_\_ Strongly agree    \_\_\_\_\_ Agree    \_\_\_\_\_ Neither agree or disagree    \_\_\_\_\_ Disagree  
\_\_\_\_\_ Strongly disagree

8. More interventions were raised during our team discussions than if I provided care individually.

\_\_\_\_\_ Strongly agree    \_\_\_\_\_ Agree    \_\_\_\_\_ Neither agree or disagree    \_\_\_\_\_ Disagree  
\_\_\_\_\_ Strongly disagree

9. The give and take among team members helps them make better patient care decisions

\_\_\_\_\_ Strongly agree    \_\_\_\_\_ Agree    \_\_\_\_\_ Neither agree or disagree    \_\_\_\_\_ Disagree  
\_\_\_\_\_ Strongly disagree

10. The team approach makes the delivery of care more efficient

\_\_\_\_\_ Strongly agree    \_\_\_\_\_ Agree    \_\_\_\_\_ Neither agree or disagree    \_\_\_\_\_ Disagree  
\_\_\_\_\_ Strongly disagree

11. Developing a patient care plan with other team members avoids errors in delivering care.

\_\_\_\_\_ Strongly agree    \_\_\_\_\_ Agree    \_\_\_\_\_ Neither agree or disagree    \_\_\_\_\_ Disagree  
\_\_\_\_\_ Strongly disagree

12. Developing an interdisciplinary patient care plan is excessively time consuming.

\_\_\_\_\_ Strongly agree    \_\_\_\_\_ Agree    \_\_\_\_\_ Neither agree or disagree    \_\_\_\_\_ Disagree  
\_\_\_\_\_ Strongly disagree

13. Team based care fosters communication among team members from different disciplines.

\_\_\_\_\_ Strongly agree    \_\_\_\_\_ Agree    \_\_\_\_\_ Neither agree or disagree    \_\_\_\_\_ Disagree  
\_\_\_\_\_ Strongly disagree

14. Each team member raised appropriate issues during team patient discussions.

\_\_\_\_\_ Strongly agree    \_\_\_\_\_ Agree    \_\_\_\_\_ Neither agree or disagree    \_\_\_\_\_ Disagree  
\_\_\_\_\_ Strongly disagree

15. Each team member actively participated in team activities.

\_\_\_\_\_ Strongly agree    \_\_\_\_\_ Agree    \_\_\_\_\_ Neither agree or disagree    \_\_\_\_\_ Disagree  
\_\_\_\_\_ Strongly disagree

16. Each team member provided valuable interventions to improve patient care and outcomes.

\_\_\_\_\_ Strongly agree    \_\_\_\_\_ Agree    \_\_\_\_\_ Neither agree or disagree    \_\_\_\_\_ Disagree  
\_\_\_\_\_ Strongly disagree

17. For most patient encounters, the time required by working as a team could be spent better in other ways.

\_\_\_\_\_ Strongly agree    \_\_\_\_\_ Agree    \_\_\_\_\_ Neither agree or disagree    \_\_\_\_\_ Disagree  
\_\_\_\_\_ Strongly disagree

18. Learning with other students will help me become a more effective member of a health care team.

\_\_\_\_\_ Strongly agree    \_\_\_\_\_ Agree    \_\_\_\_\_ Neither agree or disagree    \_\_\_\_\_ Disagree  
\_\_\_\_\_ Strongly disagree

19. Working with another discipline of students enhanced my education.

\_\_\_\_\_ Strongly agree    \_\_\_\_\_ Agree    \_\_\_\_\_ Neither agree or disagree    \_\_\_\_\_ Disagree  
\_\_\_\_\_ Strongly disagree

20. Participating in this educational experience with a physician assistant/pharmacy student enhanced my future ability to work on an interdisciplinary team.

\_\_\_\_\_ Strongly agree    \_\_\_\_\_ Agree    \_\_\_\_\_ Neither agree or disagree    \_\_\_\_\_ Disagree  
\_\_\_\_\_ Strongly disagree

21. I would welcome the opportunity to work on small group projects with other health care students.

\_\_\_\_\_ Strongly agree    \_\_\_\_\_ Agree    \_\_\_\_\_ Neither agree or disagree    \_\_\_\_\_ Disagree  
\_\_\_\_\_ Strongly disagree

22. This project should remain as a requirement for the clinical rotation year.

\_\_\_\_\_ Strongly agree    \_\_\_\_\_ Agree    \_\_\_\_\_ Neither agree or disagree    \_\_\_\_\_ Disagree  
\_\_\_\_\_ Strongly disagree

23. More shared learning days should be incorporated into this rotation.

\_\_\_\_\_ Strongly agree    \_\_\_\_\_ Agree    \_\_\_\_\_ Neither agree or disagree    \_\_\_\_\_ Disagree  
\_\_\_\_\_ Strongly disagree

24. My preceptor provided feedback in regards to improving team function.

\_\_\_\_\_ Strongly agree    \_\_\_\_\_ Agree    \_\_\_\_\_ Neither agree or disagree    \_\_\_\_\_ Disagree  
\_\_\_\_\_ Strongly disagree

25. My preceptor treated me equally to the other student.

\_\_\_\_\_ Strongly agree    \_\_\_\_\_ Agree    \_\_\_\_\_ Neither agree or disagree    \_\_\_\_\_ Disagree  
\_\_\_\_\_ Strongly disagree

26. I found this shared learning experience worthwhile.



\_\_\_\_\_ Strongly agree    \_\_\_\_\_ Agree    \_\_\_\_\_ Neither agree or disagree    \_\_\_\_\_ Disagree  
\_\_\_\_\_ Strongly disagree

27. My age is \_\_\_\_\_ years.

28. My sex is \_\_\_\_\_ female    \_\_\_\_\_ male.

29. I have had previous ambulatory care clinic experiences before this rotation. \_\_\_\_ yes, \_\_\_\_ no

If yes, briefly describe any interprofessional activities.

30. I have had previous emergency room experience before this rotation. \_\_\_\_ yes, \_\_\_\_ no

If yes, briefly describe any interprofessional activities.

31. I have had previous community pharmacy experience before this rotation. \_\_\_\_ yes, \_\_\_\_ no

If yes, briefly describe any interprofessional activities.

32. Have you worked on an interprofessional health care team (i.e. when more than one discipline worked together to care for a patient ) prior to entering your PA/pharmacy training? \_\_ yes \_\_ no

If yes, briefly describe any interprofessional activities.

33. I felt prepared for my student team experience. \_\_ yes \_\_ no

If no, how could your preparation be improved?

34. How many days of this rotation would you like to have as student team days? \_\_\_\_\_

### **Appendix 3. – Focus Group Questions**

#### **Students**

1. Can someone summarize the shared learning experience?
2. How did the interprofessional shared learning experience improve your learning?
3. How did the interprofessional shared learning experience improve your understanding of the roles and responsibilities of your other team member?
4. How did your team improve patient care outcomes and delivery?
5. What part of the project was most valuable to you?
6. Should this program be continued?
7. If the program was continued, what are some ideas to make this learning experience better?

#### **Preceptors**

1. Describe your experience with precepting the student team.
2. How did the pair perform as a team? How would you rate the level of teamwork among the student teams (low, middle or high)? Why do you feel that way?
3. Do you feel you had the needed skills to evaluate student team performance?
  - a. What additional training is required to precept students practicing in interprofessional teams?
4. Would you be willing to continue to offer shared precepting experiences to help students learn team functioning?
  - a. What are your thoughts about adding additional interprofessional team days to student rotations at your site?
  - b. What value does it provide to the education of students?

- c. What value does it provide for the care of your patients?
  - d. Colleges do not have money to pay for experiential experiences. How else can we show our appreciation for your shared precepting responsibilities?
5. What could be done to improve the shared learning interprofessional team training program for the future?
